# Supplementary material for: The DOE E3SM Version 2.1: Overview and Assessment of the Impacts of Parameterized Ocean Submesoscales
Source: Copernicus journal article supplement (doi:10.5194/gmd-2024-149), 2024-08-22
Supplement: Supplementary file [file gmd-2024-149-AC1-supplement.pdf]

### **Response to the GMD Executive Editor**

We appreciate the Executive Editor bringing our attention to the lack of documentation for the permanent archive of the code base. We have now added the DOIs for both the v2.1 (DOI: 10.5281/zenodo.7527568) and v2 (10.5281/zenodo.5563151) versions of the code used in this manuscript in the Code Availability section of the revised manuscript.

Sincerely, the authors.
